# Supplementary material
Source: MDPI journal article supplement (https://www.mdpi.com/2227-9717/9/12/2196)
Supplement: s1 [file s1]

# Supplementary Information

## **Oxidative Coupling of Methane for Ethylene Production: Reviewing Kinetic Modelling Approaches, Thermodynamics and Catalysts**

Simoní Da Ros<sup>a\*</sup>, Tahyná Barbalho Fontoura<sup>b</sup>, Marcio Schwaab<sup>c</sup>, Normando Castro de Jesus<sup>d</sup>, José Carlos Pinto<sup>b</sup>

<sup>a</sup> UCL Institute for Sustainable Heritage, University College London, 14 Upper Woburn Place, London WC1H 0NN, United Kingdom.

<sup>b</sup> Programa de Engenharia Química/COPPE, Universidade Federal do Rio de Janeiro. Cidade Universitária - CP: 68502, Rio de Janeiro, RJ, 21941-972, Brasil.

<sup>c</sup> Departamento de Engenharia Química, Escola de Engenharia, Universidade Federal do Rio Grande do Sul. Rua Ramiro Barcelos, 2777 - Prédio 22202, Porto Alegre, RS, 90035-007, Brasil.

<sup>d</sup> Braskem S.A., Rua Marumbi, 1400, Campos Elíseos, Duque de Caxias 25221-000, RJ, Brasil.

\*Corresponding author: s.ros@ucl.ac.uk (Simoní Da Ros)

## **Contents**

|                 |   |
|-----------------|---|
| Section S1..... | 2 |
| Table S1.....   | 3 |
| Figure S1.....  | 4 |
| Figure S2.....  | 5 |
| Figure S3.....  | 6 |

## Section S1 – Yields and Selectivities definitions

The yield of the compound  $i$  ( $Y_i$ ) was calculated in carbon base, using Eq. (A1), where  $n_i$  is the number of mols of the component  $i$  at the equilibrium,  $c_i$  is the number of carbon atoms of the compound  $i$ , and  $n_{0,CH_4}$  denotes the initial number of mols of methane.

$$Y_i (\%) = \frac{(c_i \cdot n_i) \cdot 100}{(n_{0,CH_4})} \quad (A1)$$

The C2 thermodynamic yield represents the combined yield from ethene and ethane, as defined in Eq. (A2).

$$Y_{C_2} (\%) = \frac{(2 \cdot n_{C_2H_4} + 2 \cdot n_{C_2H_6}) \cdot 100}{(n_{0,CH_4})} \quad (A2)$$

Selectivities were calculated in carbon base, according to Eq. (A3), where  $NC_c$  is the number of reaction products containing carbon.

$$S_i (\%) = \frac{c_i \cdot n_i \cdot 100}{\sum_{i=1}^{NC_c} (c_i \cdot n_i)} \quad (A3)$$

Selectivities in molar base were defined as Eq. (A4), where  $NC$  is the number of reaction products.

$$S_i (\%) = \frac{n_i \cdot 100}{\sum_{i=1}^{NC} n_i} \quad (A4)$$

Carbon based ethene yield in the presence of ethane co-feeding was calculated as Eq. (A5), where  $n_{0,C_2H_6}$  denotes the initial number of mols of ethane.

$$Y_{C_2H_4} (\%) = \frac{(2 \cdot n_{C_2H_4}) \cdot 100}{(n_{0,CH_4} + 2 \cdot n_{0,C_2H_6})} \quad (A5)$$

**Table S1** - Standard Gibbs energies in increasing order at 900 °C and standard reaction enthalpies for global OCM reactions [1,2].

| Entry | Reaction                                            | $\Delta G^\circ$ at 900 °C (kJ·mol <sup>-1</sup> ) | $\Delta H_{298^\circ}$ (kJ·mol <sup>-1</sup> ) |
|-------|-----------------------------------------------------|----------------------------------------------------|------------------------------------------------|
| 1     | $C_2H_4 + 2O_2 \rightarrow 2CO + 2H_2O$             | -928                                               | -757                                           |
| 2     | $CH_4 + 2O_2 \rightarrow CO_2 + 2H_2O$              | -798                                               | -802                                           |
| 3     | $CH_4 + \frac{3}{2}O_2 \rightarrow CO + 2H_2O$      | -618                                               | -519                                           |
| 4     | $CH_4 + O_2 \rightarrow CO + H_2O + H_2$            | -436                                               | -278                                           |
| 5     | $CO + \frac{1}{2}O_2 \rightarrow CO_2$              | -180                                               | -283                                           |
| 6     | $C_2H_4 + 2H_2O \rightarrow 2CO + 4H_2$             | -198                                               | 210                                            |
| 7     | $C_2H_6 + \frac{1}{2}O_2 \rightarrow C_2H_4 + H_2O$ | -197                                               | -105                                           |
| 8     | $2CH_4 + \frac{1}{2}O_2 \rightarrow C_2H_6 + H_2O$  | -112                                               | -177                                           |
| 9     | $C_2H_6 \rightarrow C_2H_4 + H_2$                   | -14.73                                             | 137                                            |
| 10    | $CO_2 + H_2 \rightarrow CO + H_2O$                  | -1.78                                              | 41                                             |
| 11    | $CO + H_2O \rightarrow CO_2 + H_2$                  | 1.78                                               | -41                                            |

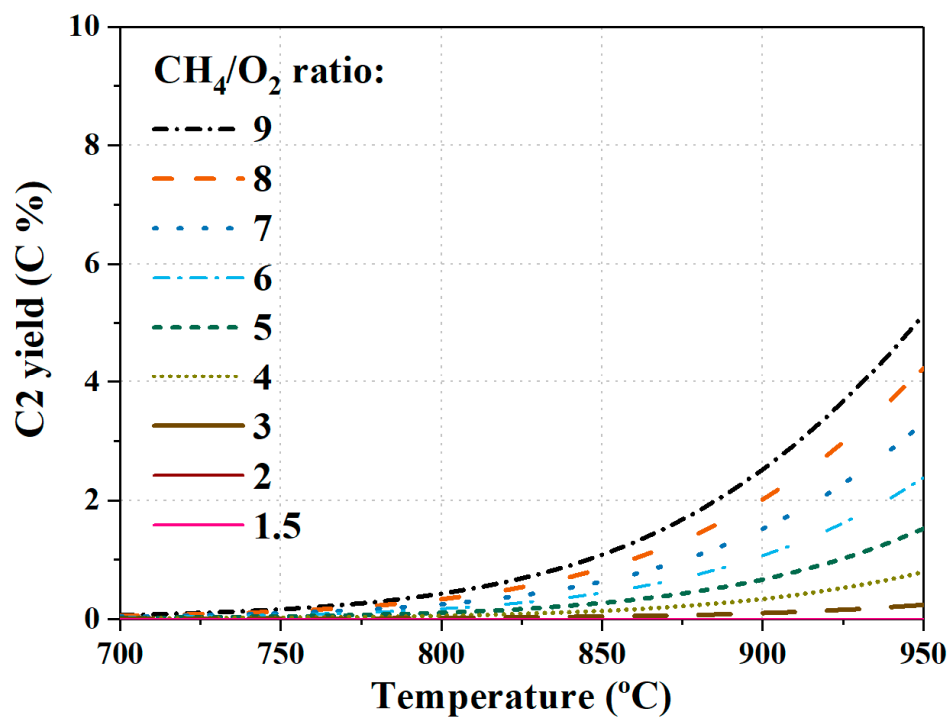

**Figure S1** - Effect of the CH<sub>4</sub>/O<sub>2</sub> feed ratio and temperature at 1 bar on the combined ethene and ethane (C<sub>2</sub>) yield. Feed composition was constituted by CH<sub>4</sub> and O<sub>2</sub> only and was varied while keeping the total number of mols fed fixed.

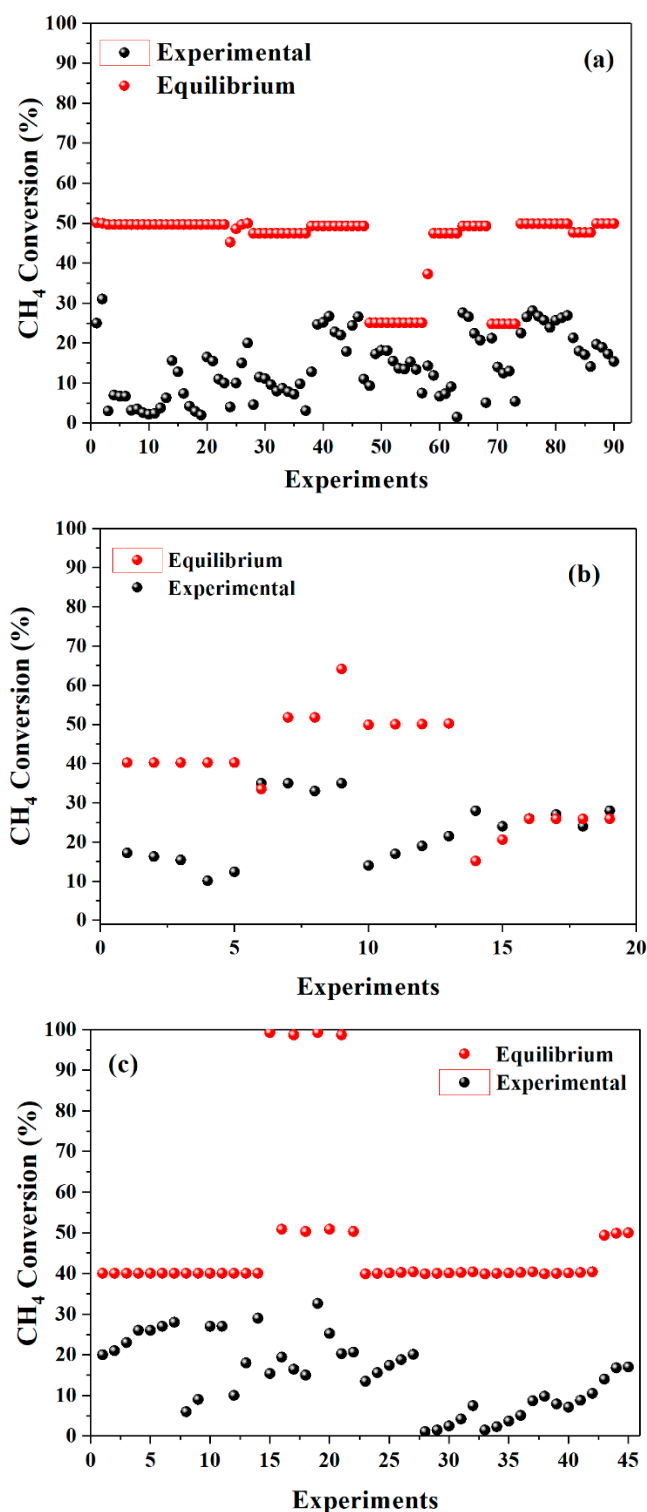

**Figure S2** - Comparison between experimental and equilibrium  $\text{CH}_4$  conversions for bimetallic oxides: (a) promoted or supported alkaline earth metals oxides, (b) involving lanthanoids metals oxides, and (c) transition or post-transition metals oxides. Equilibrium calculations were performed using the Gibbs minimisation method, as described in Section 4.

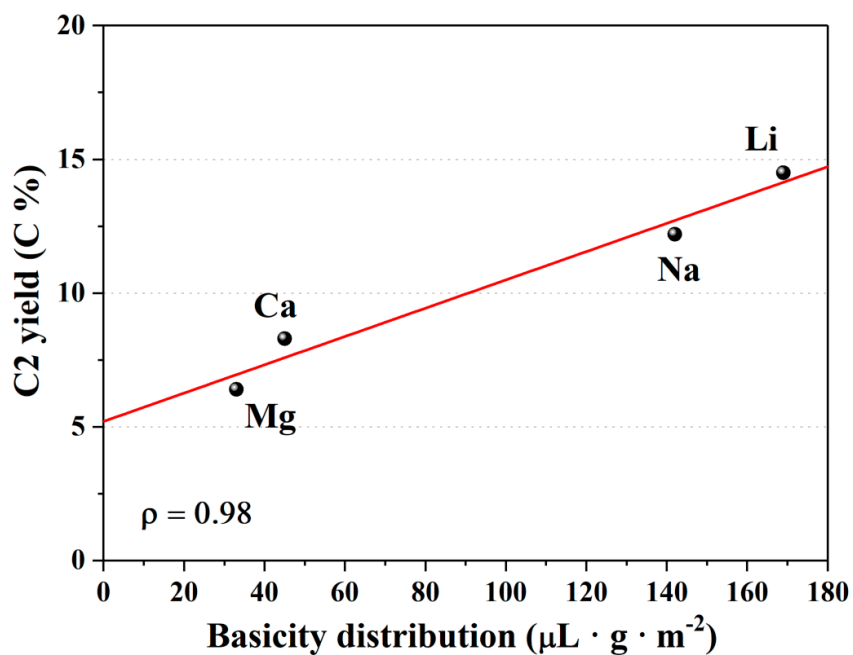

**Figure S3** – Relationship between C2 yield and basicity distribution per unit of surface area, as calculated from the ratio between the volume of desorbed CO<sub>2</sub>, in μL, and the surface area, in m<sup>2</sup>·g<sup>-1</sup>, over M-TbO<sub>x</sub>/n-MgO systems. The alkali or alkaline earth metal *M* is indicated in the figure. Catalytic activity was assessed at 700 °C, with CH<sub>4</sub>/O<sub>2</sub> feed molar ratio of 4, after 15 min of reaction time [3].

## References

- [1] Valadkhani, A.; Shahrokhi, M.; Pishvaie, M. R.; Zarrinpashneh, S. Simulation and Experimental Studies of Methane Oxidative Coupling Reaction in a Bench Scale Fixed Bed Reactor. *Energy Sources, Part A Recover. Util. Environ. Eff.* **2013**, 35 (15), 1418–1426. <https://doi.org/10.1080/15567036.2010.520070>.
- [2] Stansch, Z.; Mleczko M, L.; Baerns. Comprehensive Kinetics of Oxidative Coupling of Methane over the La<sub>2</sub>O<sub>3</sub>/CaO Catalyst. *Ind. Eng. Chem. Res.* **1997**, 36 (7), 2568–2579. <https://doi.org/10.1021/ie960562k>.
- [3] Elkins, T. W.; Roberts, S. J.; Hagelin-Weaver, H. E. Effects of Alkali and Alkaline-Earth Metal Dopants on Magnesium Oxide Supported Rare-Earth Oxide Catalysts in the Oxidative Coupling of Methane. *Appl. Catal. A Gen.* 2016, 528, 175–190. <https://doi.org/10.1016/j.apcata.2016.09.011>.
